# Supplementary material for: APOE4 impairs autophagy and Aβ clearance by microglial cells
Source: Springer Nature journal article supplement (doi:10.1007/s00011-025-02016-5), 2025-04-01
Supplement: MOESM1 [file 11_2025_2016_MOESM1_ESM.pdf]

## Supplementary

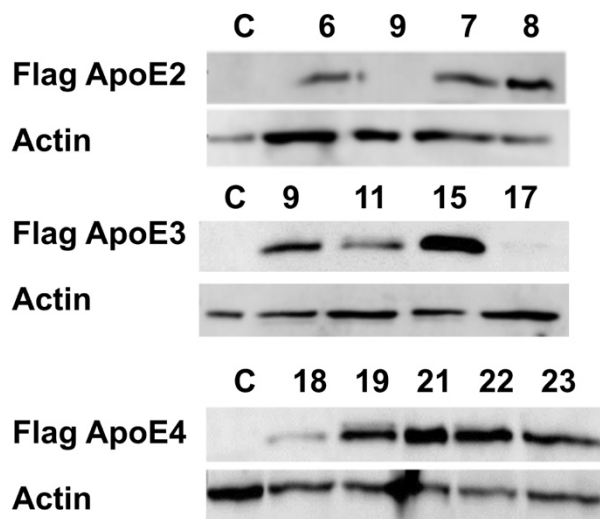

Figure S1 legend

**Example for N9 clones stably expressing Flag-APOE2, Flag-APOE3 or Flag-APOE4.**

N9 cells were transfected with either pCDNA3-Flag-APOE2, pCDNA3-Flag-APOE3 or pCDNA3-Flag-APOE4 expression vectors. Following G418 selection selected positive clones were isolated and analyzed by western blot to identify the positive clones.

Selected positive clones with similar expression levels were used for further analysis.
